# Supplementary material for: Assessment of Infection Prevention and Control Measures at Points of Entry in Sierra Leone in 2021: A Cross-Sectional Study
Source: MDPI journal article supplement (doi:10.3390/ijerph19105936), 2022-05-13
Supplement: s1 [file s1]

## Supplementary Materials

**Table S1:** Summary of the study sites

| Region    | District           | PoE Type        | PoE Name                | Number of PoE | PoE Class |
|-----------|--------------------|-----------------|-------------------------|---------------|-----------|
| Western   | Western Area Urban | Seaport         | Queen Elizabeth II Quay | 1             | Class A   |
| Northwest | Port Loko          | Airport         | Lungi International     | 1             | Class A   |
|           | Kambia             | Ground crossing | Gbalamuya               | 1             | Class A   |
| Southern  | Pujehun            | Ground crossing | Jendema                 | 1             | Class A   |

Table S2:

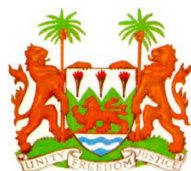

**A CHECKLIST ADAPTED FROM THE WHO INFECTION PREVENTION AND CONTROL TOOL USED TO ASSESS IPC STATUS AT THE  
FOUR CLASS A POINTS OF ENTRIES IN SIERRA LEONE**

**Purpose: Assessment of infection prevention and control Measures at Points of Entry (PoE) in Sierra Leone in 2021: a cross-sectional study**

**1. General Information:**

|                                   |                                |                |                      |                   |                      |
|-----------------------------------|--------------------------------|----------------|----------------------|-------------------|----------------------|
| Date                              | <input type="text" value="/"/> | District       | <input type="text"/> | City/Town/Village | <input type="text"/> |
| PoE name                          | <input type="text"/>           | PoE type       | <input type="text"/> | PoE class         | <input type="text"/> |
| Name & Designation of interviewer | <input type="text"/>           | Contact number | <input type="text"/> | E-mail address    | <input type="text"/> |
| Name & Designation of respondent  | <input type="text"/>           | Contact number | <input type="text"/> | E-mail address    | <input type="text"/> |

## 2. Infection Prevention and Control (IPC) Components

### i. IPC guidelines

*PoEs should have guidelines on IPC that align with and contribute towards the prevention of infections and antimicrobial resistance in the environment*

| No.  | Questions                                                                                                                                                                        | Answer                       | Score      |
|------|----------------------------------------------------------------------------------------------------------------------------------------------------------------------------------|------------------------------|------------|
| 1    | Does the PoE have guidelines on the following? (Indicate <b>YES</b> only if guideline is available)                                                                              |                              |            |
| i    | Screening of travelers upon arrival or departure                                                                                                                                 | <input type="checkbox"/> Yes | 1          |
|      |                                                                                                                                                                                  | <input type="checkbox"/> No  | 0          |
| ii   | Isolation of suspected/sick travelers                                                                                                                                            | <input type="checkbox"/> Yes | 1          |
|      |                                                                                                                                                                                  | <input type="checkbox"/> No  | 0          |
| iii  | Referral of suspected/sick travelers                                                                                                                                             | <input type="checkbox"/> Yes | 1          |
|      |                                                                                                                                                                                  | <input type="checkbox"/> No  | 0          |
| iv   | Hand hygiene                                                                                                                                                                     | <input type="checkbox"/> Yes | 1          |
|      |                                                                                                                                                                                  | <input type="checkbox"/> No  | 0          |
| v    | Outbreak management and preparedness                                                                                                                                             | <input type="checkbox"/> Yes | 1          |
|      |                                                                                                                                                                                  | <input type="checkbox"/> No  | 0          |
| vi   | Cleaning and disinfection                                                                                                                                                        | <input type="checkbox"/> Yes | 1          |
|      |                                                                                                                                                                                  | <input type="checkbox"/> No  | 0          |
| vii  | Port health staff protection and safety                                                                                                                                          | <input type="checkbox"/> Yes | 1          |
|      |                                                                                                                                                                                  | <input type="checkbox"/> No  | 0          |
| viii | Waste management                                                                                                                                                                 | <input type="checkbox"/> Yes | 1          |
|      |                                                                                                                                                                                  | <input type="checkbox"/> No  | 0          |
| 2    | If yes, are the guidelines consistent with national/international guidelines                                                                                                     | <input type="checkbox"/> Yes | 1          |
|      |                                                                                                                                                                                  | <input type="checkbox"/> No  | 0          |
| 3    | Are port health staff involved in both planning and executing the implementation of IPC guidelines in addition to IPC personnel?                                                 | <input type="checkbox"/> Yes | 1          |
|      |                                                                                                                                                                                  | <input type="checkbox"/> No  | 0          |
| 4    | Are relevant stakeholders (for example, clinicians, EPR personnel, port managers) involved in the development and adaptation of the IPC guidelines in addition to IPC personnel? | <input type="checkbox"/> Yes | 1          |
|      |                                                                                                                                                                                  | <input type="checkbox"/> No  | 0          |
| 5    | Do port staff receive specific training related to new or updated IPC guidelines introduced at the PoE?                                                                          | <input type="checkbox"/> Yes | 1          |
|      |                                                                                                                                                                                  | <input type="checkbox"/> No  | 0          |
|      | <b>Subtotal score</b>                                                                                                                                                            |                              | <b>/12</b> |

## ii. IPC training

*PoE staff should be trained on general principles of IPC*

| No. | Questions                                                                                                                         | Answer                                                                                                           | Score |
|-----|-----------------------------------------------------------------------------------------------------------------------------------|------------------------------------------------------------------------------------------------------------------|-------|
| 1   | Are there port health staff trained on basic IPC? (If yes state when)                                                             | <input type="checkbox"/> Yes                                                                                     | 1     |
|     |                                                                                                                                   | <input type="checkbox"/> No                                                                                      | 0     |
| 2   | If yes, how frequently do port health staff receive training regarding IPC in your station?                                       | <input type="checkbox"/> Never or rarely                                                                         | 0     |
|     |                                                                                                                                   | <input type="checkbox"/> New employee orientation                                                                | 0.2   |
|     |                                                                                                                                   | <input type="checkbox"/> New employee orientation and regular (at least annually) IPC training but not mandatory | 0.5   |
|     |                                                                                                                                   | <input type="checkbox"/> New employee orientation and regular (at least annually) mandatory IPC training         | 1     |
| 3   | If yes, are port health staff trained through interactive training sessions (for example, on-the-job training and/or simulation)? | <input type="checkbox"/> Yes                                                                                     | 1     |
|     |                                                                                                                                   | <input type="checkbox"/> No                                                                                      | 0     |
| 4   | Has the port cleaning staff received basic training on IPC? (If yes state when)                                                   | <input type="checkbox"/> Yes                                                                                     | 1     |
|     |                                                                                                                                   | <input type="checkbox"/> No                                                                                      | 0     |
| 5   | How frequently do the cleaners receive training regarding IPC in your station?                                                    | <input type="checkbox"/> Never or rarely                                                                         | 0     |
|     |                                                                                                                                   | <input type="checkbox"/> New employee orientation                                                                | 0.2   |
|     |                                                                                                                                   | <input type="checkbox"/> New employee orientation and regular (at least annually) IPC training but not mandatory | 0.5   |
|     |                                                                                                                                   | <input type="checkbox"/> New employee orientation and regular (at least annually) mandatory IPC training         | 1     |
| 6   | Has the administrative and managerial staff receive basic training on IPC?                                                        | <input type="checkbox"/> Yes                                                                                     | 1     |
|     |                                                                                                                                   | <input type="checkbox"/> No                                                                                      | 0     |
|     | <b>Subtotal score</b>                                                                                                             | <b>/6</b>                                                                                                        |       |

### iii. Monitoring of IPC practices

PoE staff IPC practices should be monitored routinely for efficiency

| No. | Questions                                                                                                                          | Answer                                                         | Score |
|-----|------------------------------------------------------------------------------------------------------------------------------------|----------------------------------------------------------------|-------|
| 1   | Are there periodic evaluations or monitoring of IPC compliance?<br>(Verify that monitoring report is available)                    | <input type="checkbox"/> Yes                                   | 1     |
|     |                                                                                                                                    | <input type="checkbox"/> No                                    | 0     |
| 2   | If yes, are there trained personnel responsible for the monitoring of IPC practices?                                               | <input type="checkbox"/> Yes                                   | 1     |
|     |                                                                                                                                    | <input type="checkbox"/> No                                    | 0     |
| 3   | If yes, is there a well-defined structured checklist to support the monitoring?<br>(Verify that monitoring checklist is available) | <input type="checkbox"/> Yes                                   | 1     |
|     |                                                                                                                                    | <input type="checkbox"/> No                                    | 0     |
| 4   | If yes, which of the following processes and indicators are monitored?                                                             |                                                                |       |
| i   | Hand hygiene compliance                                                                                                            | <input type="checkbox"/> Yes                                   | 1     |
|     |                                                                                                                                    | <input type="checkbox"/> No                                    | 0     |
| ii  | Cleaning and disinfection of the environment                                                                                       | <input type="checkbox"/> Yes                                   | 1     |
|     |                                                                                                                                    | <input type="checkbox"/> No                                    | 0     |
| iii | Waste management                                                                                                                   | <input type="checkbox"/> Yes                                   | 1     |
|     |                                                                                                                                    | <input type="checkbox"/> No                                    | 0     |
|     |                                                                                                                                    | <input type="checkbox"/> Never                                 | 0     |
| 5   | How frequently do you monitor these indicators?                                                                                    | <input type="checkbox"/> Periodically, but no regular schedule | 0.5   |
|     |                                                                                                                                    | <input type="checkbox"/> At least annually                     | 1     |
| 6   | Do you give feedback reports on the state of the IPC activities/performance? (Verify that feedback report is available)            | <input type="checkbox"/> Yes                                   | 1     |
|     |                                                                                                                                    | <input type="checkbox"/> No                                    | 0     |
| 7   | If yes, who do you share the monitoring report with?                                                                               |                                                                |       |
| I   | Port health staff (Verify)                                                                                                         | <input type="checkbox"/> Yes                                   | 1     |
|     |                                                                                                                                    | <input type="checkbox"/> No                                    | 0     |
| ii  | Port health management and senior administration (Verify)                                                                          | <input type="checkbox"/> Yes                                   | 1     |

|  |                       |                             |   |
|--|-----------------------|-----------------------------|---|
|  |                       | <input type="checkbox"/> No | 0 |
|  | <b>Subtotal score</b> | <b>/10</b>                  |   |

#### iv. Screening station

*There should be a well-equipped screening station at the entrance of the PoE with a hand hygiene station (with soap and water and/or hand sanitizer). Personal protective equipment (PPE) should be available in adequate quantities for use when necessary.*

| No. | Questions                                                                                                                                                                | Answer                                                      | Score |
|-----|--------------------------------------------------------------------------------------------------------------------------------------------------------------------------|-------------------------------------------------------------|-------|
| 1   | Is there a screening station at the entrance of the PoE? (Verify)                                                                                                        | <input type="checkbox"/> Yes                                | 1     |
|     |                                                                                                                                                                          | <input type="checkbox"/> No                                 | 0     |
| 2   | If yes, is the screening station manned by a port health staff?                                                                                                          | <input type="checkbox"/> Yes                                | 1     |
|     |                                                                                                                                                                          | <input type="checkbox"/> No                                 | 0     |
| 3   | Are the following screening equipment and materials available at the screening station?<br>(Indicate <b>YES</b> only if screening equipment and materials are available) |                                                             |       |
| i   | Algorithm for screening                                                                                                                                                  | <input type="checkbox"/> Yes                                | 1     |
|     |                                                                                                                                                                          | <input type="checkbox"/> No                                 | 0     |
| ii  | Screening register/questionnaire                                                                                                                                         | <input type="checkbox"/> Yes                                | 1     |
|     |                                                                                                                                                                          | <input type="checkbox"/> No                                 | 0     |
| iii | Functional Infrared thermometer                                                                                                                                          | <input type="checkbox"/> Yes                                | 1     |
|     |                                                                                                                                                                          | <input type="checkbox"/> No                                 | 0     |
| iv  | Functional hand hygiene station (with soap, water, and/or alcohol-based hand rub)?                                                                                       | <input type="checkbox"/> Yes                                | 1     |
|     |                                                                                                                                                                          | <input type="checkbox"/> No                                 | 0     |
| 4   | Are water services available and of sufficient quantity for uses such as hand hygiene, personal hygiene and drinking) (Verify, note quantity)                            | <input type="checkbox"/> None                               | 0     |
|     |                                                                                                                                                                          | <input type="checkbox"/> Some                               | 0.2   |
|     |                                                                                                                                                                          | <input type="checkbox"/> Mostly                             | 0.5   |
|     |                                                                                                                                                                          | <input type="checkbox"/> Fully                              | 1     |
| 5   | Are PPEs (Face mask, face shield) available at the screening station in sufficient quantity? (Verify)                                                                    | <input type="checkbox"/> None                               | 0     |
|     |                                                                                                                                                                          | <input type="checkbox"/> Yes but not in sufficient quantity | 0.5   |
|     |                                                                                                                                                                          | <input type="checkbox"/> Yes, in sufficient quantity        | 1     |

|  |                |    |  |
|--|----------------|----|--|
|  | Subtotal score | /8 |  |
|--|----------------|----|--|

#### v. Cleaning and sanitation

*Clean and hygienic environments are necessary for both staff and travelers*

| No. | Questions                                                                                                                                | Answer                                                      | Score |
|-----|------------------------------------------------------------------------------------------------------------------------------------------|-------------------------------------------------------------|-------|
| 1   | Are there dedicated personnel for cleaning at the PoE?                                                                                   | <input type="checkbox"/> Yes                                | 1     |
|     |                                                                                                                                          | <input type="checkbox"/> No                                 | 0     |
| 2   | If yes, how frequently is the cleaning carried out?                                                                                      | <input type="checkbox"/> Yes                                | 1     |
|     |                                                                                                                                          | <input type="checkbox"/> No                                 | 0     |
| 3   | Is there a well-maintained toilet facility?                                                                                              | <input type="checkbox"/> None                               | 0     |
|     |                                                                                                                                          | <input type="checkbox"/> Yes, not well maintained           | 0.5   |
|     |                                                                                                                                          | <input type="checkbox"/> Yes, well maintained               | 1.0   |
| 4   | Are appropriate and well-maintained materials for cleaning (for example, detergent, mops, buckets and water) available? <i>(Observe)</i> | <input type="checkbox"/> None                               | 0     |
|     |                                                                                                                                          | <input type="checkbox"/> Yes but not in sufficient quantity | 0.5   |
|     |                                                                                                                                          | <input type="checkbox"/> Yes, in sufficient quantity        | 1     |
| 5   | Are waste collection containers available for waste in close proximity to waste generation points? <i>(Observe)</i>                      | <input type="checkbox"/> Yes                                | 1     |
|     |                                                                                                                                          | <input type="checkbox"/> No                                 | 0     |

|   |                                                                                                                          |                              |           |
|---|--------------------------------------------------------------------------------------------------------------------------|------------------------------|-----------|
| 6 | If yes, is a functional burning pit/fenced waste dump or municipal pick-up available for disposal of waste?<br>(Observe) | <input type="checkbox"/> Yes | 1         |
|   |                                                                                                                          | <input type="checkbox"/> No  | 0         |
|   | <b>Subtotal score</b>                                                                                                    |                              | <b>/6</b> |

#### vi. Isolation facility

*There should be a designated area/private room(s) if available that has a comfortable temperature and good ventilation assigned for travelers suspected of infectious disease for further assessment*

| No. | Questions                                                                                                                          | Answer                       | Score |
|-----|------------------------------------------------------------------------------------------------------------------------------------|------------------------------|-------|
| 1   | Is there a designated isolation area for suspected/sick travelers until further evaluation?<br>(Observe)                           | <input type="checkbox"/> Yes | 1     |
|     |                                                                                                                                    | <input type="checkbox"/> No  | 0     |
| 2   | Is the isolation area in a permanent structure?                                                                                    | <input type="checkbox"/> Yes | 1     |
|     |                                                                                                                                    | <input type="checkbox"/> No  | 0     |
| 3   | Is the isolation area standard with separate toilet and waste management?                                                          | <input type="checkbox"/> Yes | 1     |
|     |                                                                                                                                    | <input type="checkbox"/> No  | 0     |
| 4   | Are there trained port health staff to identify travelers with suspected priority disease (e.g. COVID-19)?                         | <input type="checkbox"/> Yes | 1     |
|     |                                                                                                                                    | <input type="checkbox"/> No  | 0     |
| 5   | If yes, are travelers that meet the case definition for suspected priority disease immediately isolated/separated from the others? | <input type="checkbox"/> Yes | 1     |



|   |                                                                                                                                                         |                              |           |
|---|---------------------------------------------------------------------------------------------------------------------------------------------------------|------------------------------|-----------|
|   |                                                                                                                                                         | <input type="checkbox"/> No  | 0         |
| 6 | Are travelers with respiratory symptoms identified on arrival, given a medical mask and guidance on cough etiquette? <i>(Availability of face mask)</i> | <input type="checkbox"/> Yes | 1         |
|   |                                                                                                                                                         | <input type="checkbox"/> No  | 0         |
|   | <b>Subtotal score</b>                                                                                                                                   |                              | <b>/6</b> |

### vii. System of referral

*PoEs should have a system for referral of suspected/sick travelers to healthcare facilities for further assessment and treatment*

| No. | Questions                                                                                                                                                                                                        | Answer                       | Score |
|-----|------------------------------------------------------------------------------------------------------------------------------------------------------------------------------------------------------------------|------------------------------|-------|
| 1   | Is there a system for the referral of symptomatic travelers with suspected priority diseases to healthcare facilities? <i>(SOP for referrals)</i>                                                                | <input type="checkbox"/> Yes | 1     |
|     |                                                                                                                                                                                                                  | <input type="checkbox"/> No  | 0     |
| 2   | If yes, does this PoE have key information regarding the referral health facilities? (Information such as health facility address, the phone number, distance from PoE and map of routes to the health facility) | <input type="checkbox"/> Yes | 1     |
|     |                                                                                                                                                                                                                  | <input type="checkbox"/> No  | 0     |
| 3   | Is there a means of transportation for suspected travelers to the identified healthcare facilities? (if yes please state)                                                                                        | <input type="checkbox"/> Yes | 1     |
|     |                                                                                                                                                                                                                  | <input type="checkbox"/> No  | 0     |
| 4   | Are there informative posters/IEC materials on COVID-19 at this PoE? E.g. observing hand hygiene, respiratory hygiene, physical distancing, signs & symptoms.                                                    | <input type="checkbox"/> Yes | 1     |

|   |                                                                                                                                                        |                              |           |
|---|--------------------------------------------------------------------------------------------------------------------------------------------------------|------------------------------|-----------|
|   | (confirm COVID-19 information posters)                                                                                                                 | <input type="checkbox"/> No  | 0         |
| 5 | Does this PoE have channels and procedures for communicating health measures on arrival and departure?<br>(SOP for risk communication/leaflet/posters) | <input type="checkbox"/> Yes | 1         |
|   |                                                                                                                                                        | <input type="checkbox"/> No  | 0         |
|   | <b>Subtotal score</b>                                                                                                                                  |                              | <b>/5</b> |
